# Supplementary material for: A systematic review on the impact of gestational Lyme disease in humans on the fetus and newborn
Source: PubMed Central journal article supplement (PMC6231644; doi:10.1371/journal.pone.0207067), 2018-11-12
Supplement: pone.0207067.s001.pdf [file pone.0207067.s001.pdf]

## Systematic Review Protocol

# What is the evidence that gestational Lyme disease in humans causes adverse birth outcomes including congenital abnormalities?

### Authors:

Lisa Waddell<sup>1</sup>, Judy Greig<sup>1</sup>

<sup>1</sup>Public Health Risk Sciences Division of the National Microbiology Laboratory, Public Health Agency of Canada.

Contact: Lisa Waddell, Tel:226-979-7174 or email: lisa.waddell@phac-aspc.gc.ca

### Important Dates:

Evidence published up to October 16, 2017

## Table of Contents

|                                                            |   |
|------------------------------------------------------------|---|
| Systematic Review Protocol.....                            | 1 |
| Authors: .....                                             | 1 |
| Important Dates:.....                                      | 1 |
| Objectives of the Systematic Review .....                  | 3 |
| Study Question.....                                        | 3 |
| Methods.....                                               | 3 |
| Review Team Expertise and Responsibilities .....           | 3 |
| Search Strategy .....                                      | 3 |
| Algorithms.....                                            | 3 |
| Databases.....                                             | 3 |
| Search Verification .....                                  | 4 |
| Grey Literature Search .....                               | 4 |
| Search Results and Database Specific Search Details: ..... | 4 |
| Relevance Screening (RS).....                              | 6 |
| Inclusion / Exclusion criteria .....                       | 6 |
| Risk-of-bias assessment and GRADE:.....                    | 6 |

Data Extraction ..... 7

Review management: ..... 7

Data analysis: ..... 7

Appendix ..... 8

    Relevance screening Title/Abstract tool ..... 8

    Quality Assessment and Data Extraction tools ..... 8

## Objectives of the Systematic Review

Conduct a systematic review to identify, critically appraise, extract data on relevant outcomes and synthesize the literature on the impact of Lyme disease during pregnancy. Methods following the best practices for synthesis research prescribed by the Cochrane Collaboration will be utilized to undertake this project.

## Study Question

*What is the evidence that gestational Lyme disease in humans causes adverse birth outcomes including congenital abnormalities?*

**Inclusion criteria:** is all evidence examining the impact of maternal Lyme disease in humans for any outcome conducted anywhere in the world.

**Exclusion criteria:** research on non-human hosts including animal models of the impact of *Borrelia burgdorferi* infection on pregnancy, fetal and newborn outcomes.

## Methods

### Review Team Expertise and Responsibilities

| Member           | Organization  | Project Role*                 |
|------------------|---------------|-------------------------------|
| Lisa Waddell     | RISK - Guelph | Synthesis expertise- co-lead  |
| Judy Greig       | RISK - Guelph | Synthesis expertise – co-lead |
| Nicholas Ogden   | NML           | Expert Advisory               |
| Robbin Lindsay   | NML           | Expert Advisory               |
| Allison Hinckley | CDC           | Expert Advisory               |

## Search Strategy

The search algorithm below will be executed in 3 bibliographic databases Pubmed, Scopus and Embase on October 16, 2017 via the Public Health Agency of Canada library. A search verification strategy was employed to identify any literature that was omitted from the bibliographic database search. Search results will be downloaded, deduplicated and managed in reference management software, Endnote.

### Algorithms

((lyme or borrelia or borreliosis) and (pregnancy or pregnant or maternal or fetus or foetus or newborn or congenital))

### Databases

Pubmed, Scopus and Embase

## Search Verification

Reference lists of a minimum of four relevant publications (book chapters, literature reviews and/or primary research articles) will be scanned for relevant citations missed by the electronic search. If we are still finding missed publications after four papers, additional papers will be selected and the reference lists will be scanned until we no longer identify potentially relevant research that has not been captured already.

## Grey Literature Search

The following websites were searched by using simple combinations of the keywords lyme or borrelia and pregnancy or fetus or newborn to identify potentially relevant pages and each page was screened for primary data related to the topic. Potentially relevant grey literature would be added to the citation list for relevance screening. However, no additional citations were found.

1. Center for disease control and prevention (CDC) <https://www.cdc.gov/>
2. European Center for Disease Control and Prevention (ECDC) <https://ecdc.europa.eu>
3. Public Health Agency of Canada, <https://www.canada.ca>

## Search Results and Database Specific Search Details:

Database search results for Pubmed, Scopus and Embase October 16, 2017.

### **Pubmed: n=392 (no limits, mapping on)**

((((lyme or borrelia or borreliosis) and (pregnancy or pregnant or maternal or fetus or foetus or newborn or congenital)))

### **Scopus: n=403, limited to articles, conference proceedings and journal articles (excluded books, reviews, patents etc.)**

TITLE-ABS-KEY ( ( ( lyme OR borrelia OR borreliosis ) AND ( pregnancy OR pregnant OR maternal OR fetus OR foetus OR newborn OR congenital ) ) ) AND ( LIMIT-TO ( DOCTYPE , "ar" ) OR LIMIT-TO ( DOCTYPE , "cp" ) ) AND ( LIMIT-TO ( SRCTYPE , "j" ) )

### **Embase: n=534 limited to research or work about humans using Embase' filter.**

((lyme or borrelia or borreliosis) and (pregnancy or pregnant or maternal or fetus or foetus or newborn or congenital)).mp. [mp=title, abstract, heading word, drug trade name, original title, device manufacturer, drug manufacturer, device trade name, keyword, floating subheading word] –**limit to human**

**Search Verification:** Reference lists of the following publications were evaluated for relevant citations missed by the electronic search (Walsh *et al.*, 2007), (Mylonas, 2011), (Gardner, 1995), (McClure & Goldenberg, 2009, Gardner, 2001, Shapiro, 2011)

Table: List of 13 citations identified by search verification

| Reference                                                                                                                                                                                                                                                                                                                            | Fate in Review                                                                                               |
|--------------------------------------------------------------------------------------------------------------------------------------------------------------------------------------------------------------------------------------------------------------------------------------------------------------------------------------|--------------------------------------------------------------------------------------------------------------|
| Ciesielski CA, Russell H, Johnson S, et al.: Prospective study of pregnancy outcome in women with Lyme disease (abstract). 27th ICAAC, 1987.                                                                                                                                                                                         | Included                                                                                                     |
| Lavoie PE, Lattner BP, Duray PH, Malawista SE, Barbour AG, Johnson RC. 1987. Culture positive, seronegative transplacental Lyme borreliosis infant mortality. <i>Arthritis Rheum</i> 3(suppl):S50.                                                                                                                                   | Included                                                                                                     |
| Dlesk A, Broste SK, Harkins PG, McCarty PA, Mitchell PD. 1989. Lyme seropositivity and pregnancy outcome in the absence of symptoms of Lyme disease. <i>Arthritis Rheum</i> 32(suppl):S46                                                                                                                                            | Included                                                                                                     |
| Trevisan G, Stinco G, Cinco M. Neonatal skin lesions due to a spirochetal infection: a case of congenital Lyme borreliosis? <i>Int J Dermatol</i> 1997;36:677–680.                                                                                                                                                                   | Included                                                                                                     |
| Sigal LH. Pregnancy complicated by Lyme disease. June 2005. Available at <a href="http://www.uptodate.com">http://www.uptodate.com</a> . Accessed June 2006.                                                                                                                                                                         | Can't obtain – may be an editorial on a subscription site.                                                   |
| Podolsky ML. Lyme disease in pregnancy: the new great imitator. <i>Clin Adv Treat Infect</i> . 5(5):1, 1991 (probably a review)                                                                                                                                                                                                      | Can't obtain – likely a review                                                                               |
| Lampert F. Infantile multisystem inflammatory disease: another case of a new syndrome. <i>Eur J Pediatr</i> 144:593, 1986                                                                                                                                                                                                            | Included                                                                                                     |
| Williams CL, Benach JL, Curran AS et al. Lyme disease during pregnancy: a cord blood serosurvey. <i>Ann N Y Acad Sci</i> 539:504, 1988                                                                                                                                                                                               | Included                                                                                                     |
| Hercogova J, Moidlova M, Zirny J et al. Could borrelia found in the placenta influence the fetus? Study of 19 women with erythema migrans during pregnancy. In Program and Abstracts of the 6 <sup>th</sup> Interantioanl Conference on Lyme Borreliosis. Bologna, Italy, Societa Editrice Esculapio, 1994, p76 (abstract No PO 06T) | Can't obtain, have a full paper that precedes, Hercogova 1993, this meeting with similar information (n=15). |
| Bracero LA, Wormser GP, Leikin E, Tejani N, Prevalence of seropositivity to the Lyme disease spirochete during pregnancy in an epidemic area. A preliminary report. <i>J Matern Fetal Invest</i> . 2:265-268, 1992                                                                                                                   | Included                                                                                                     |
| Duray PH, Steere AC. Clinical pathologic correlations of Lyme disease by stage. <i>Ann N Y Acad Sci</i> 539: 65, 1988.                                                                                                                                                                                                               | Not relevant                                                                                                 |
| Preiur HM, Giscelli C. Arthropathy with rash, chronic meningitis, eye lesions and mental retardation. <i>J pediatr</i> 99: 79, 1981.                                                                                                                                                                                                 | Not relevant                                                                                                 |
| Robinson TT, Herman L, Birrer RB, Lyme carditis; a rare presentation in an unexpected setting. <i>Am J emerg Med</i> 16(3): 265-269, 1998.                                                                                                                                                                                           | Not relevant                                                                                                 |

**Grey literature search:** No additional citations were found.

**Total deduplicated citations to be screened for relevance= 753**

## Relevance Screening (RS)

The relevance screening level will be done on the title, abstract and keywords where available. There is 1 question and the answers are based upon the inclusion / exclusion criteria and can be found in the appendix.

### Inclusion / Exclusion criteria

#### **Potential inclusion/exclusion criteria**

- 1) Time frame – no time frame
- 2) Country – All
- 3) Language – English, French. All other languages will be identified, the paper will be obtained and we will evaluate if there are resources to include papers in other languages.
- 4) Document Type: Any article, report or thesis containing primary data (data collected by the author/ author's organisation). All literature reviews, letters, commentaries, new reports etc that do not contain primary data will be excluded at relevance screening (based on title/abstract) or the beginning of the second level (based on the full paper).
- 5) Study design – all
- 6) Population- studies on humans and the impact of infection on human pregnancies. Animal models and other studies on *B. burgdorferi* infection in animals will be identified as such at relevance screening and excluded from the review.
- 7) Pathogen – Any of the *B. burgdorferi* group of borrelia.

## Risk-of-bias assessment and GRADE:

Relevant studies that meet all eligibility criteria will undergo a risk of bias assessment. Most relevant studies are expected to be case reports, cross-sectional or cohort design. A risk of bias assessment tool will be developed to assess the internal validity of the study, ie: whether it answers the research question correctly. In this sense we are assessing systematic error, deviation from the truth, in results or inferences (Balshem *et al.*, 2011, Guyatt *et al.*, 2011b, Higgins & Altman, 2008). These biases may vary in direction and magnitude; however it is impossible to know the extent that the biases have influenced the results of a study (Higgins & Altman, 2008). The risk of bias evaluates selection bias, performance bias, attrition bias, detection bias, reporting bias and confounding bias. The results of this help us to use the GRADE criteria to grade the evidence (Balshem *et al.*, 2011, Higgins & Green, 2011, The, 2013).

For each outcome a Grading of Recommendations Assessment, Development and Evaluation (GRADE) criteria was applied (Guyatt *et al.*, 2011a, Higgins & Green, 2011, The, 2013). The risk of bias assessment aims to assess the internal validity of the study which informs one of the GRADE criteria (Higgins & Green, 2011, Higgins & Altman, 2008). The other 6 GRADE components include indirectness of

evidence, unexplained heterogeneity, imprecision/high prevision of results, high probability of publication bias, studies are underestimating the measure of effect and detection of a dose-response gradient. GRADE criteria are summarized across groups of like studies to indicate the level of confidence in the current evidence (The, 2013). The one to four star grading system indicates: \*\*\*\* high confidence that the effect estimate is close to the true effect; \*\*\* moderate confidence in the effect estimate, but future studies may be substantially different; \*\* limited confidence in the estimate of effect, the true effect may be substantially different; \* very little confidence in the estimate of effect, the true effect is likely to be substantially different (Balslem et al., 2011, Guyatt et al., 2011b, Schunemann *et al.*, 2011).

## **Data Extraction**

A data extraction form was developed to extract general study information and capture specific quantitative and descriptive outcomes from each study captured in this review. See the Data extraction form in the Appendix.

## **Review management:**

To ensure rigour in the review process, all steps will be conducted using pre-tested tools by two independent reviewers. All references identified in the review will be de-duplicated in the reference management program Endnote© (Thomson Reuters, USA) and imported into the systematic review management software DistillerSR (Evidence Partners, Ottawa, Canada) to facilitate review management and progress. All extracted data will be downloaded as Excel spreadsheets for analysis.

## **Data Analysis:**

Extracted data from relevant articles will be descriptively characterized and summarized. Quantitative outcomes including prevalence, counts, and measures of association will be converted where necessary into a standard effect size metric, based on the mostly commonly used measure reported in relevant studies (Borenstein *et al.*, 2009). Data will then be stratified into sufficiently comparable subgroups if there are some, and random-effects meta-analysis will be conducted to determine average effect sizes and the extent of heterogeneity across studies in each subgroup [8]. Meta-analysis will be conducted using Stata (StataCorp LP, College Station, USA). We do not anticipate having outcomes with enough data to warrant meta-analysis.

## Appendix

### Relevance screening Title/Abstract tool

Is the citation primary research on pregnant women, fetus or newborns and the impact of *Borrelia burgdorferi* (Lyme disease) infection during any stage of pregnancy?

- Yes – primary research on humans
- Yes – relevant literature **review or guidelines**
- No – paper is about **treatment** of LD during pregnancy in humans
- No – **animal** model/study about the impact of *B. burgdorferi* infection during pregnancy.
- No - not relevant

### Quality Assessment and Data Extraction tools

| Relevance Confirmation with full paper                                                                                                                                         |                                                                                                                                                                                                                                                                                                                                                                                                                              |                                                                                                                                                                                                                                                                                                                                                  |
|--------------------------------------------------------------------------------------------------------------------------------------------------------------------------------|------------------------------------------------------------------------------------------------------------------------------------------------------------------------------------------------------------------------------------------------------------------------------------------------------------------------------------------------------------------------------------------------------------------------------|--------------------------------------------------------------------------------------------------------------------------------------------------------------------------------------------------------------------------------------------------------------------------------------------------------------------------------------------------|
| Question                                                                                                                                                                       | Options                                                                                                                                                                                                                                                                                                                                                                                                                      | Comments                                                                                                                                                                                                                                                                                                                                         |
| 1) Is the citation primary research on pregnant women, fetus or newborns and the impact of <i>Borrelia burgdorferi</i> (Lyme disease) infection during any stage of pregnancy? | <input type="checkbox"/> Yes – primary research on humans<br><input type="checkbox"/> Yes – relevant literature <b>review or guidelines</b><br><input type="checkbox"/> No – paper is about <b>treatment</b> of LD during pregnancy in humans<br><input type="checkbox"/> No – <b>animal</b> model/study about the impact of <i>B. burgdorferi</i> infection during pregnancy.<br><input type="checkbox"/> No - not relevant | <p><b>Lyme disease</b> is caused by the bacterium <i>Borrelia</i> spp. and is transmitted to humans by tick vectors.</p> <p><b>Primary research:</b> a study where the authors collected and analyzed their own data – may use quantitative or qualitative methods or both to investigate the research question and report original results.</p> |
| 2) What language is the article published in?                                                                                                                                  | <input type="checkbox"/> English<br><input type="checkbox"/> French<br><input type="checkbox"/> Other: ___ specify                                                                                                                                                                                                                                                                                                           |                                                                                                                                                                                                                                                                                                                                                  |
| 3) What <i>Borrelia burgdorferi</i> sensu lato was the cause of the infection(s) described in the paper?                                                                       | <input type="checkbox"/> BB s.l. (specify): _____<br><input type="checkbox"/> <b>Not relevant Borrelia.</b>                                                                                                                                                                                                                                                                                                                  | * Indicate (NS) if the type of <i>Borrelia</i> was not specified (due to only serological results, failure to isolate, not reported etc.)                                                                                                                                                                                                        |
| 4) What continent and country are the samples from?                                                                                                                            | <input type="checkbox"/> North America<br><input type="checkbox"/> Europe<br><input type="checkbox"/> Asia                                                                                                                                                                                                                                                                                                                   |                                                                                                                                                                                                                                                                                                                                                  |



|                                                                                                                                                             |                                                                                                                                                                                                                                                                                                                                                                                                                                                                                    |                                                                                                                                                                                                                                                                                                                                                                                                                                                                                                         |
|-------------------------------------------------------------------------------------------------------------------------------------------------------------|------------------------------------------------------------------------------------------------------------------------------------------------------------------------------------------------------------------------------------------------------------------------------------------------------------------------------------------------------------------------------------------------------------------------------------------------------------------------------------|---------------------------------------------------------------------------------------------------------------------------------------------------------------------------------------------------------------------------------------------------------------------------------------------------------------------------------------------------------------------------------------------------------------------------------------------------------------------------------------------------------|
|                                                                                                                                                             | <input type="checkbox"/> South America<br><input type="checkbox"/> Middle east<br><input type="checkbox"/> Australia<br>Country (specify): _____                                                                                                                                                                                                                                                                                                                                   |                                                                                                                                                                                                                                                                                                                                                                                                                                                                                                         |
| <b>5) Indicate whether maternal, fetal or newborn outcomes are reported in the paper.</b>                                                                   | <input type="checkbox"/> Maternal outcomes<br><input type="checkbox"/> Miscarriage/ pregnancy loss<br><input type="checkbox"/> Fetal outcomes (Outcome measured before birth)<br><input type="checkbox"/> Newborn outcomes (Outcome measured after birth)<br><input type="checkbox"/> Long-term impact of congenital defects (e.g. autism)<br><input type="checkbox"/> Other potentially relevant outcome: specify _____<br><input type="checkbox"/> No relevant outcomes reported |                                                                                                                                                                                                                                                                                                                                                                                                                                                                                                         |
| <p><b>* If an exclusion criteria was selected for any of the above questions, please submit the form and do not proceed to Risk of Bias assessment.</b></p> |                                                                                                                                                                                                                                                                                                                                                                                                                                                                                    |                                                                                                                                                                                                                                                                                                                                                                                                                                                                                                         |
| <b>Risk of bias assessment</b>                                                                                                                              |                                                                                                                                                                                                                                                                                                                                                                                                                                                                                    |                                                                                                                                                                                                                                                                                                                                                                                                                                                                                                         |
| 6) What is the publication year of this article?                                                                                                            | <input type="checkbox"/> [text]                                                                                                                                                                                                                                                                                                                                                                                                                                                    | Enter year or NR if not reported                                                                                                                                                                                                                                                                                                                                                                                                                                                                        |
| 7) In what year were the samples collected?                                                                                                                 | <input type="checkbox"/> [text]                                                                                                                                                                                                                                                                                                                                                                                                                                                    | Enter year or NR if not reported                                                                                                                                                                                                                                                                                                                                                                                                                                                                        |
| 8) What is the study design?<br><br><i>(Check all that apply)</i>                                                                                           | <input type="checkbox"/> Case Report/Case series<br><input type="checkbox"/> Cross-sectional<br><input type="checkbox"/> Cohort<br><input type="checkbox"/> Case-control<br><input type="checkbox"/> Other: [text]                                                                                                                                                                                                                                                                 | <p><b>Report ONLY study design(s) relevant to the research question.</b></p> <p><b>Observational study:</b> Assignment of subjects into an exposed group versus a control group is outside the control of the investigator.</p> <ul style="list-style-type: none"> <li>• <b>Cross-sectional:</b> Examines the relationship of a risk factor and outcome (disease) at a point in time on representative samples of the target population.</li> <li>• <b>Cohort study:</b> is a study in which</li> </ul> |

|                                                                                                                                                                                                                                                     |                                                                                                                                                                                                                             |                                                                                                                                                                                                                                                                                                                                                                                                                                                                                                                    |
|-----------------------------------------------------------------------------------------------------------------------------------------------------------------------------------------------------------------------------------------------------|-----------------------------------------------------------------------------------------------------------------------------------------------------------------------------------------------------------------------------|--------------------------------------------------------------------------------------------------------------------------------------------------------------------------------------------------------------------------------------------------------------------------------------------------------------------------------------------------------------------------------------------------------------------------------------------------------------------------------------------------------------------|
|                                                                                                                                                                                                                                                     |                                                                                                                                                                                                                             | <p>individuals with differing exposures to a suspected risk factor are observed through time for occurrence of an outcome</p> <ul style="list-style-type: none"> <li>• <b>Case-control study:</b> compares exposure to the risk factor in subjects who have an outcome (the 'cases') with subjects who do not have the outcome, but are otherwise similar (the 'controls') and drawn from the same sampling frame. <b>There may be an occasional experimental design</b> – please include under “other”</li> </ul> |
| <p><b>9) Was the allocation sequence adequately generated? (GRADE 1-1)</b></p> <p>“RCT, ChT Selection bias: systematic differences between baseline characteristics of the groups that are compared.”</p>                                           | <p><input type="checkbox"/> Yes (low risk of bias): [text]</p> <p><input type="checkbox"/> Unclear: [text]</p> <p><input type="checkbox"/> No: [text]</p> <p><input type="checkbox"/> NA – not an experiment [RCT, ChT]</p> | <p><b>Yes:</b> allocation sequence is described in sufficient detail ___page #__.</p> <p><b>Unclear:</b> they simply stated that it was “randomized” (formerly partial).</p> <p><b>No:</b> Sample drawn without a formal process of random selection: judgment, convenience, purposive.</p>                                                                                                                                                                                                                        |
| <p><b>10) Was the allocation sequence adequately concealed from the participants and the researcher? (GRADE 1-2)</b></p> <p>“RCT, ChT Selection bias: systematic differences between baseline characteristics of the groups that are compared.”</p> | <p><input type="checkbox"/> Yes: [text]</p> <p><input type="checkbox"/> Unclear: [text]</p> <p><input type="checkbox"/> No: [text]</p> <p><input type="checkbox"/> NA – not an experiment [RCT, ChT]</p>                    | <p><b>Yes:</b> concealment was sufficient and allocation was unlikely to be foreseen (in advance of or during enrollment) ___ page #__</p> <p><b>Unclear:</b> author only indicated “blinding” or “concealed treatment” was used.</p> <p><b>No:</b> no concealment strategy described or was insufficient.</p>                                                                                                                                                                                                     |
| <p><b>11) Was the level of exposure representative of exposure in the population of interest?</b></p>                                                                                                                                               | <p><input type="checkbox"/> Yes: [text]</p> <p><input type="checkbox"/> Unclear: [text]</p>                                                                                                                                 | <p><b>Yes:</b> Does the sample reflect the proportion of high risk and low risk people in the population the</p>                                                                                                                                                                                                                                                                                                                                                                                                   |

|                                                                                                                                                                                                                                                                                                                                                                                                                                                                                       |                                                                                                                                                                                                                                                         |                                                                                                                                                                                                                                                                  |
|---------------------------------------------------------------------------------------------------------------------------------------------------------------------------------------------------------------------------------------------------------------------------------------------------------------------------------------------------------------------------------------------------------------------------------------------------------------------------------------|---------------------------------------------------------------------------------------------------------------------------------------------------------------------------------------------------------------------------------------------------------|------------------------------------------------------------------------------------------------------------------------------------------------------------------------------------------------------------------------------------------------------------------|
| <p><b>(GRADE 1-3)</b></p> <p>“Cohort Selection bias: systematic differences between sample and target population.”</p>                                                                                                                                                                                                                                                                                                                                                                | <p><input type="checkbox"/> No: [text]</p> <p><input type="checkbox"/> NA- not a cohort study</p>                                                                                                                                                       | <p>investigator would like to extrapolate the results to?</p> <p>No</p>                                                                                                                                                                                          |
| <p>12) Were the study participants (samples) selected randomly so the sample reflects disease and exposure in the population of interest? (Cross-sectional)</p> <p>OR</p> <p>Were the controls selected from the same source population as the cases? (case control)(GRADE 1-4)</p> <p>“Selection bias: systematic differences between sample and target population or for case control studies between the groups being compared and an appropriate range of clinical severity.”</p> | <p><input type="checkbox"/> Yes</p> <p><input type="checkbox"/> Unclear- too few details are available to make a clear judgement</p> <p><input type="checkbox"/> No: [text]</p> <p><input type="checkbox"/> NA- not a case control, cross-sectional</p> | <p>Selection bias:</p> <p>Yes: Random selection of the study participants or samples are stated and described or objective identification of controls in case control stated.</p> <p>No: Study participants were selected non-randomly or were not Described</p> |
| <p>13) Was blinding for patients/sample and individuals involved in the care of the patients/sample appropriate? (Patient, doctor, vet, health care worker) <i>Please note if there is a different answer for different outcomes. (GRADE, 1-10)</i></p> <p>“All studies: Performance bias: Systematic differences between groups in the care that is provided, or in exposure to factors other than the intervention of interest.”</p>                                                | <p><input type="checkbox"/> Yes</p> <p><input type="checkbox"/> Unclear, reported that blinding was used [text]</p> <p><input type="checkbox"/> No: [text]</p> <p><input type="checkbox"/> NA case report</p>                                           | <p>Was knowledge of the status of the individual or sample adequately prevented during the study?</p>                                                                                                                                                            |

|                                                                                                                                                                                                                                                                                                       |                                                                                                                                                                                                                                  |                                                                                                                                                                                                                                                                                                                                   |
|-------------------------------------------------------------------------------------------------------------------------------------------------------------------------------------------------------------------------------------------------------------------------------------------------------|----------------------------------------------------------------------------------------------------------------------------------------------------------------------------------------------------------------------------------|-----------------------------------------------------------------------------------------------------------------------------------------------------------------------------------------------------------------------------------------------------------------------------------------------------------------------------------|
| <p>14) Was blinding for the outcome assessor, statistician and manuscript writer appropriate? <i>Please note if there is a different answer for different outcomes. (GRADE, 1-11)</i></p> <p>“All studies: Detection bias: Systematic differences between groups in how outcomes are determined.”</p> | <p><input type="checkbox"/> Yes (low risk of bias)</p> <p><input type="checkbox"/> Unclear, reported that blinding was used [text]</p> <p><input type="checkbox"/> No: [text]</p> <p><input type="checkbox"/> NA case report</p> | <p>Was knowledge of the status of the individual or sample adequately prevented during the study?</p>                                                                                                                                                                                                                             |
| <p>15) <b>Incomplete outcome data;</b> Was loss to follow-up equal in both groups? (GRADE 1-5)</p> <p>“experiments, cohort, long prev: Attrition bias; Systematic differences between groups in withdrawal from the study.”</p>                                                                       | <p><input type="checkbox"/> Yes (low risk of bias)</p> <p><input type="checkbox"/> Unclear: [text]</p> <p><input type="checkbox"/> No: [text]</p> <p><input type="checkbox"/> NA case report</p>                                 | <p>Describe the completeness of outcome data for each main outcome, including attrition and exclusions from the analysis.</p> <p>Unclear: there are too few details to make a judgment.</p> <p>No: explain i.e. there was loss to follow-up and it was not clearly reported, appears to be high&gt;20%, thus there is concern</p> |
| <p>16) <b>Incomplete outcome data:</b> If observations were excluded from the analysis, were the exclusions appropriate and/or clearly justified in the text? (GRADE 1-6, new)</p> <p>“all studies: Reporting bias: Systematic differences between reported and unreported findings”</p>              | <p><input type="checkbox"/> Yes: (low risk of bias)</p> <p><input type="checkbox"/> Unclear: [text]</p> <p><input type="checkbox"/> No [text]</p> <p><input type="checkbox"/> NA case report</p>                                 | <p>Yes: [text]</p> <p>Unclear: there are too few details to make a judgment.</p>                                                                                                                                                                                                                                                  |
| <p>17) Does the study appear to have reported all intended outcomes? (GRADE 1-7, new)</p> <p>“Reporting bias: Systematic differences between reported and unreported findings (e.g.</p>                                                                                                               | <p><input type="checkbox"/> Yes (low risk of bias)</p> <p><input type="checkbox"/> Unclear: [text]</p> <p><input type="checkbox"/> No: [text]</p>                                                                                | <p>Reporting bias</p> <p>Yes: page#___</p> <p>Unclear: too few details are available to make a clear judgement</p>                                                                                                                                                                                                                |

|                                                                                                                                                                                                                                                                                                                                                                                                                                                                                                                                                                                                                                                                                                                                            |                                                                                                                                                                                                                                           |                                                                                                                                                                                                                                                                                                                                                                                                                                                                                                                                                                                                                                                                       |
|--------------------------------------------------------------------------------------------------------------------------------------------------------------------------------------------------------------------------------------------------------------------------------------------------------------------------------------------------------------------------------------------------------------------------------------------------------------------------------------------------------------------------------------------------------------------------------------------------------------------------------------------------------------------------------------------------------------------------------------------|-------------------------------------------------------------------------------------------------------------------------------------------------------------------------------------------------------------------------------------------|-----------------------------------------------------------------------------------------------------------------------------------------------------------------------------------------------------------------------------------------------------------------------------------------------------------------------------------------------------------------------------------------------------------------------------------------------------------------------------------------------------------------------------------------------------------------------------------------------------------------------------------------------------------------------|
| <p>only statistically significant findings reported)”</p>                                                                                                                                                                                                                                                                                                                                                                                                                                                                                                                                                                                                                                                                                  |                                                                                                                                                                                                                                           | <p>No: explain_</p>                                                                                                                                                                                                                                                                                                                                                                                                                                                                                                                                                                                                                                                   |
| <p>18) Have confounders been appropriately identified and accounted for? (GRADE 1-9)</p> <p>“Confounding bias: a variable that distorts the relationship between the exposure and outcome of interest. Particularly an issue in observational studies.”</p>                                                                                                                                                                                                                                                                                                                                                                                                                                                                                | <p><input type="checkbox"/> Yes (low risk of bias)</p> <p><input type="checkbox"/> Partial: [text]</p> <p><input type="checkbox"/> Raw Data</p> <p><input type="checkbox"/> No: [text]</p> <p><input type="checkbox"/> NA case report</p> | <p>Confounding bias:</p> <p>Yes: All-important confounding factors were identified, accounted for by exclusion, matching or analysis. (sex, age, ethnicity etc.)</p> <p>Partial: some confounders controlled but not all of them.</p> <p>Raw data so post hoc analysis could be done</p> <p>No: Not stated.</p>                                                                                                                                                                                                                                                                                                                                                       |
| <p>19) Was the study free of other problems that could put it at a high risk of bias? (GRADE 1-8, new)</p> <p>“Other performance bias, detection biases, non-response bias, recruitment bias, misclassification, or biases related to poor study design and conduct.” e.g.</p> <ul style="list-style-type: none"> <li>- Observational studies, <b>non-response bias</b> means that only a particular subset participated and is not reflective of the general population.</li> <li>- Statistical analysis was not appropriate, the results are invalid and there is insufficient raw data.</li> </ul> <p>Misclassification bias: Were the methods to classify samples into exposure, disease and outcome groups standard and reliable?</p> | <p><input type="checkbox"/> Yes (low risk of bias)</p> <p><input type="checkbox"/> Unclear: [text]</p> <p><input type="checkbox"/> No: [text]</p>                                                                                         | <p>All other bias' that could put the study at risk.</p> <p>e.g.: non-randomization, clusters, stopping the study early without explanation, sample size intended (these are NOT more likely to have biased results)</p> <p>Vs.</p> <p>Obvious imbalance in baseline factors that have an influence on the outcome. Outcome assessment can become biased. Selective reporting of subgroups can be biased (these ARE more likely to have biased results)</p> <p>Yes, I have no additional concerns about the design and/or conduct and reporting of this study.</p> <p>No, the following are concerns I have that this study is at risk of bias. (list with page#)</p> |

|                                                                                                                                                                                                   |                                                                                                                                                                                                                                                                                                                   |                                                                                                                                                                                                                                                                                                                                                                                                                                                                                                                                                                                                                                                                               |
|---------------------------------------------------------------------------------------------------------------------------------------------------------------------------------------------------|-------------------------------------------------------------------------------------------------------------------------------------------------------------------------------------------------------------------------------------------------------------------------------------------------------------------|-------------------------------------------------------------------------------------------------------------------------------------------------------------------------------------------------------------------------------------------------------------------------------------------------------------------------------------------------------------------------------------------------------------------------------------------------------------------------------------------------------------------------------------------------------------------------------------------------------------------------------------------------------------------------------|
| <p><b>20) Based on the risk of bias questions (GRADE 1-1 to 1-11) please indicate the overall risk of bias for this study (GRADE 1-12, new)</b></p>                                               | <p><input type="checkbox"/> Low RoB</p> <p><input type="checkbox"/> Unclear RoB</p> <p><input type="checkbox"/> High RoB</p>                                                                                                                                                                                      | <p>Low risk of bias: no biases were indicated in the assessment. Thus plausible bias is unlikely in all key domains (within this study). (Across studies: most studies indicate low risk)</p> <p>Unclear risk of bias, there are plausible bias that raises doubt about the results as some key domains are “unclear (within this study). (Across studies: most information is from low or unclear RoB).</p> <p>High Risk of bias indicates that in one or more of the domains serious plausible bias was identified (within the study). (Across studies: The proportion of studies that are at high risk of bias is sufficient to affect the interpretation of results.)</p> |
| <p><b>21) Does this study examine the question of interest directly? (GRADE 2-1, new)</b></p>                                                                                                     | <p><input type="checkbox"/> Yes, this study directly addresses the question of interest. Please state which outcomes were directly answered [text]</p> <p><input type="checkbox"/> No, this study indirectly examines the question of interest. Please state which outcomes were not directly answered [text]</p> | <p>A study may indirectly address the question of interest if:</p> <p>e.g. risk factors we wish to compare are measured independently in two separate trials compared to controls.</p> <p>e.g. the population, risk factors , comparisons or outcomes were not exactly what we are trying to draw conclusions for.</p> <p>* Downgrading occurs if there is reason to believe that there may be differences in the conclusions due to indirectness.</p>                                                                                                                                                                                                                        |
| <p><b>22) Was this study funded by or was there involvement of individuals employed by or affiliated with industry (drug or chemical) or a special interest / advocacy group? (GRADE 5-1,</b></p> | <p><input type="checkbox"/> No, There are no concerns based on the authors, funding and declarations in the paper.</p> <p><input type="checkbox"/> Yes[text]</p>                                                                                                                                                  | <p>This criteria for down-grading would be used if all or most of the trials captured are industry funded or declare heavy sponsor involvement (e.g. advocacy groups), in which case there are concerns that studies of null or negative effect may have been suppressed from</p>                                                                                                                                                                                                                                                                                                                                                                                             |

|                                                                                                                                                                                                                                |                                                                                                                                                                                                                                                                                                         |                                                                                                                                                                                                                                                                                                                                                                                                                         |
|--------------------------------------------------------------------------------------------------------------------------------------------------------------------------------------------------------------------------------|---------------------------------------------------------------------------------------------------------------------------------------------------------------------------------------------------------------------------------------------------------------------------------------------------------|-------------------------------------------------------------------------------------------------------------------------------------------------------------------------------------------------------------------------------------------------------------------------------------------------------------------------------------------------------------------------------------------------------------------------|
| <p>new)</p> <p>Identify in text box details:</p> <p>-if there was a declaration of involvement.</p> <p>- if the study was funded by such an organization</p> <p>-if the author's affiliation was for such an organization.</p> |                                                                                                                                                                                                                                                                                                         | <p>publication.</p> <p><b>Select yes and provide details if there was industry or advocacy group sponsorship.</b></p>                                                                                                                                                                                                                                                                                                   |
| <p>23) Is there reason to believe that due to the population studied, the magnitude of effect (association) of the risk factor (outcome) may be underestimated? (GRADE 6-1, new)</p>                                           | <p><input type="checkbox"/> Yes, an underestimation is likely</p> <p><input type="checkbox"/> No, there is no reason to believe the estimated effect is underestimated.</p>                                                                                                                             | <p>You would answer yes ONLY if there was good reason to think that the study underestimated the potential association or effect of a risk factor due to the population that was sampled.</p> <p>e.g. The magnitude of association was lower than it likely is in the general population because the comparison group has a similar disease which in also more likely to result in having the exposure of interest.</p> |
| <p>24) Was a dose-response gradient detected for the exposure being examined? (GRADE 7-1, new)</p>                                                                                                                             | <p><input type="checkbox"/> Yes, dose-response gradient detected. Please state which outcomes demonstrated a dose-response gradient [text]</p> <p><input type="checkbox"/> No: no does-response gradient reported. Please state which outcomes did not demonstrated a dose-response gradient [text]</p> | <p>If a dose response gradient is demonstrated in some or all of the studies, this increases our confidence in the findings of the study and thus we can consider upgrading the evidence.</p>                                                                                                                                                                                                                           |

**Data Collection Forms:**

1. Case report information (1 form per case)
2. Epidemiological information (summary data on case series, cross-sectional, case control and cohorts): prevalence or association data (1 outcome per form)

*Note: if testing methods are referenced to another paper and sufficiently described*





|                         |                                                                                                                                                                                                                                                                                                                                                                                                                                              |                                                                                                                                                                                                                                                                                                                 |
|-------------------------|----------------------------------------------------------------------------------------------------------------------------------------------------------------------------------------------------------------------------------------------------------------------------------------------------------------------------------------------------------------------------------------------------------------------------------------------|-----------------------------------------------------------------------------------------------------------------------------------------------------------------------------------------------------------------------------------------------------------------------------------------------------------------|
|                         | <input type="checkbox"/> Was the placenta positive? Describe results [text]<br><input type="checkbox"/> Other descriptors of the placenta that should be noted [text]                                                                                                                                                                                                                                                                        |                                                                                                                                                                                                                                                                                                                 |
| Cord blood outcomes     | <input type="checkbox"/> Describe the test methods for cord blood results. [text]<br><input type="checkbox"/> Describe the results of cord blood testing [text]<br><input type="checkbox"/> Other descriptors of cord blood outcomes that should be noted? [text]                                                                                                                                                                            |                                                                                                                                                                                                                                                                                                                 |
| Fetal outcomes          | <input type="checkbox"/> When (stage of pregnancy) did miscarriage or fetal death occur? [text]<br><input type="checkbox"/> Results of autopsy [text]<br><input type="checkbox"/> Describe tests conducted and whether it was specific for <i>B. burgdorferi</i> . [text]<br><input type="checkbox"/> Results of testing fetus for BB.<br><input type="checkbox"/> Other important descriptors of fetus outcomes that should be noted [text] | <p>e.g. Still born at 35 weeks.</p> <p>e.g. No external malformations, atrioventricular canal ventricular septal defect.</p> <p>e.g. indirect immunofluorescence (not further described) in a retrospective examination of fetal autopsy tissue. Spirochetes identified in "tissue" (not further specified)</p> |
| Newborn/Infant outcomes | <input type="checkbox"/> What pregnancy week was the child born? [text]<br><input type="checkbox"/> Sex of child: [text]<br><input type="checkbox"/> Describe health at birth: [text]                                                                                                                                                                                                                                                        | <p>e.g 39<sup>th</sup> week</p> <p>e.g. male/ female</p> <p>e.g. died 30 minutes after birth, jaundice, Infant Developed respiratory distress within first day of life,</p>                                                                                                                                     |

|                     |                                                                                                                                                                                                                                                                                                                                                                                                                                                                                                                                                                                                                                                                                                                                                                                                                                                                                                                                                                                                                                            |                                                                                                                                                                                                                                                                                                                                                                                                                                                                                                                                                                                                                                                                                                                                                                 |
|---------------------|--------------------------------------------------------------------------------------------------------------------------------------------------------------------------------------------------------------------------------------------------------------------------------------------------------------------------------------------------------------------------------------------------------------------------------------------------------------------------------------------------------------------------------------------------------------------------------------------------------------------------------------------------------------------------------------------------------------------------------------------------------------------------------------------------------------------------------------------------------------------------------------------------------------------------------------------------------------------------------------------------------------------------------------------|-----------------------------------------------------------------------------------------------------------------------------------------------------------------------------------------------------------------------------------------------------------------------------------------------------------------------------------------------------------------------------------------------------------------------------------------------------------------------------------------------------------------------------------------------------------------------------------------------------------------------------------------------------------------------------------------------------------------------------------------------------------------|
|                     | <ul style="list-style-type: none"> <li><input type="checkbox"/> Describe any symptoms of Lyme disease infection in the newborn (note time of appearance) [text]</li> <li><input type="checkbox"/> Describe the tests conducted to establish Lyme disease in the child (note whether the test was specific to <i>B. burgdorferi</i>) [text]</li> <li><input type="checkbox"/> Describe the results to establish Lyme disease in the child [text]</li> <li><input type="checkbox"/> Describe how the child was treated and if treatment was successful. [text]</li> <li><input type="checkbox"/> If the child died, describe the physical findings of the autopsy: [text]</li> <li><input type="checkbox"/> If the child died, describe the post-mortem testing for Lyme disease or spirochetes: [text]</li> <li><input type="checkbox"/> What were the results of the post-mortem testing for Lyme disease or spirochetes:</li> <li><input type="checkbox"/> Other important descriptors for the child/new born outcomes? [text]</li> </ul> | <p>hypoglycemia and fever. Infant was healthy after treatment. etc.</p> <p>e.g. 3 weeks old to 9 months old he had relapsing multiple annular erythema.</p> <p>e.g. Culture (no description), No pathogens detected.</p> <p>e.g. large (1 cm diameter) ventriculoseptal defect and showed an absence of the left hemidiaphragm with herniation of abdominal viscera into the left hemithorax.</p> <p>e.g. Culture tissues= modified Kelly's medium and dark field microscopy: Spirochetes cultured from liver. Indirect Immunofluorescence (monoclonal antibody H5332): immunoflouresced in myocardium, adrenal, brain. Warthin-Starry silver stain: identified spriochetes in the myocardium, liver and brain. Serology was negative (test not described).</p> |
| Additional comments | [text]                                                                                                                                                                                                                                                                                                                                                                                                                                                                                                                                                                                                                                                                                                                                                                                                                                                                                                                                                                                                                                     |                                                                                                                                                                                                                                                                                                                                                                                                                                                                                                                                                                                                                                                                                                                                                                 |

**Data Extraction of Epidemiological information**

Appropriate for outcomes that summarize data on case series, cross-sectional, case control and cohorts. Extract 1 outcome per form, multiple forms per study possible. Information can include count information,

| prevalence data or association data.                                                                                                             |                                                                                                                                                                                                                                                                                                                                                                                       |                                                                                                                                                                                                                                                                                         |
|--------------------------------------------------------------------------------------------------------------------------------------------------|---------------------------------------------------------------------------------------------------------------------------------------------------------------------------------------------------------------------------------------------------------------------------------------------------------------------------------------------------------------------------------------|-----------------------------------------------------------------------------------------------------------------------------------------------------------------------------------------------------------------------------------------------------------------------------------------|
| Describe the sampling frame<br><i>(you only need to do this 1x per study unless the data varies, I can copy and paste through the dataset ;)</i> | Description of sampling frame [text]<br><br>Location [text]<br><br>Place [text]<br><br>Date [text]                                                                                                                                                                                                                                                                                    | e.g. state, county, city<br><br>e.g. name of facility<br><br>e.g. sampling dates<br><br>e.g. Prospectively enrolled consecutive asymptomatic LD positive or equivocal ELISA pregnant women.                                                                                             |
| Describe the <b>exposure</b> reported in this form include sample & outcome options to determine +ve/-ve:                                        | [text]                                                                                                                                                                                                                                                                                                                                                                                | This should be the establishment of Lyme disease in the mother +ve vs. -ve, spirochetes in the placenta or cord blood, may be treated vs. untreated LD in pregnancy etc in the sample.                                                                                                  |
| Describe the test conducted to assess the <b>exposure</b> (e.g. clinical assessment, Lyme disease testing etc.)                                  | [text]                                                                                                                                                                                                                                                                                                                                                                                |                                                                                                                                                                                                                                                                                         |
| Describe the <b>outcome</b> reported in this form sample & outcome options to determine +ve/-ve:                                                 | [text]                                                                                                                                                                                                                                                                                                                                                                                | This should be the health of the newborn vs. abnormalities, # of miscarriages vs. full term pregnancies, etc. (could also be rate in case series compared to a national rate of negative pregnancy outcomes)                                                                            |
| Describe the test conducted to assess the <b>outcome</b> (e.g. clinical assessment, Lyme disease testing etc.)                                   | [text]                                                                                                                                                                                                                                                                                                                                                                                |                                                                                                                                                                                                                                                                                         |
| <b>Dichotomous/Ordinal Data</b><br><br>(Note; if prevalence is the outcome, just fill in the data for group 1.)                                  | <input type="checkbox"/> Define group 1 [text]<br><input type="checkbox"/> Define group 2 [text]<br><input type="checkbox"/> Specify "positive" [text]<br><input type="checkbox"/> Specify "negative" [text]<br><input type="checkbox"/> No. positive in group 1 [text]<br><input type="checkbox"/> No. negative in group 1 [text]<br><input type="checkbox"/> Proportion positive in | <b>Only answer based on how outcome data are REPORTED</b><br><br><b>Dichotomous:</b> Sufficient information includes: <ul style="list-style-type: none"> <li>• Numerator <b>and</b> denominator, <b>or</b></li> <li>• proportion + EITHER numerator or denominator <b>or</b></li> </ul> |

|                                                                                                                         |                                                                                                                                                                                                                                                                                                                                                                                                                                                                                                                                                                                                                                                                                                                                                                                                                                                                                                                                                                            |                                                                                                                                                                                                                                                                                                                                                                                                                                                                                                    |
|-------------------------------------------------------------------------------------------------------------------------|----------------------------------------------------------------------------------------------------------------------------------------------------------------------------------------------------------------------------------------------------------------------------------------------------------------------------------------------------------------------------------------------------------------------------------------------------------------------------------------------------------------------------------------------------------------------------------------------------------------------------------------------------------------------------------------------------------------------------------------------------------------------------------------------------------------------------------------------------------------------------------------------------------------------------------------------------------------------------|----------------------------------------------------------------------------------------------------------------------------------------------------------------------------------------------------------------------------------------------------------------------------------------------------------------------------------------------------------------------------------------------------------------------------------------------------------------------------------------------------|
|                                                                                                                         | <p>group 1 [text]</p> <ul style="list-style-type: none"> <li><input type="checkbox"/> N in group 1 – <i>if 2x2 is not provided</i> [text]</li> <li><input type="checkbox"/> No. positive in group 2 [text]</li> <li><input type="checkbox"/> No. negative in group 2 [text]</li> <li><input type="checkbox"/> Proportion positive in group 2 [text]</li> <li><input type="checkbox"/> N in group 2 – <i>if 2x2 is not provided</i> [text]</li> <li><input type="checkbox"/> If greater than two groups, specify data for other groups [text]</li> <li><input type="checkbox"/> Specify type of measure of association reported (OR, RR, etc.) [text]</li> <li><input type="checkbox"/> Measure of association value and measure of variability as reported [text]</li> <li><input type="checkbox"/> Was measure of effect adjusted for other variables? Please specify: [text]</li> <li><input type="checkbox"/> Define what the measure of effect means [text]</li> </ul> | <ul style="list-style-type: none"> <li>• Measure of association (e.g. odds ratio, relative risk) + EITHER a measure of variability (SE, CIs, variance) <i>or</i> an exact P-value</li> </ul> <p>e.g. Odds Ratio</p> <p>e.g. OR 2.5 (2.1-2.9), OR 2.5 (SE 0.4) etc.</p> <p>If the measure of effect is different across confounders, please specify these results as well.</p> <p>e.g. The odds of detecting abnormalities in newborns were 2.5 times higher in LD seropositive pregnant women.</p> |
| <p>Continuous outcome?<br/>(hidden unless selected)</p>                                                                 | <ul style="list-style-type: none"> <li><input type="checkbox"/> Yes (<i>expand below</i>)</li> </ul>                                                                                                                                                                                                                                                                                                                                                                                                                                                                                                                                                                                                                                                                                                                                                                                                                                                                       |                                                                                                                                                                                                                                                                                                                                                                                                                                                                                                    |
| <p><b>Raw continuous data (group 1 vs. group 2 data):</b> Raw continuous data in each group (final outcome measure)</p> | <ul style="list-style-type: none"> <li><input type="checkbox"/> Define group 1 [text]</li> <li><input type="checkbox"/> outcome in group 1 [text]</li> <li><input type="checkbox"/> SD in group 1 [text]</li> <li><input type="checkbox"/> N in group 1 [text]</li> <li><input type="checkbox"/> Define group 2 [text]</li> <li><input type="checkbox"/> outcome in group 2 [text]</li> <li><input type="checkbox"/> SD in group 2 [text]</li> </ul>                                                                                                                                                                                                                                                                                                                                                                                                                                                                                                                       | <p><b>Continuous:</b> Sufficient information includes:</p> <ul style="list-style-type: none"> <li>• Mean, sample size, + EITHER a measure of variability (e.g. SD, CIs) <i>or</i> exact P-value/t-value <b>or</b></li> <li>• Sample size and P-value/t-value from t-test <b>or</b></li> <li>• Difference in means and a measure of variability (SD, SE, CIs, variance) <b>or</b></li> <li>• Difference in means, sample size, + EITHER a common SD <i>or</i> an exact P-</li> </ul>                |

|                                                                    |                                                                                                                                                                                                                                                                                                                                                                                                                                                                                                                                                                                                                                                                                                      |                                                                                                                |
|--------------------------------------------------------------------|------------------------------------------------------------------------------------------------------------------------------------------------------------------------------------------------------------------------------------------------------------------------------------------------------------------------------------------------------------------------------------------------------------------------------------------------------------------------------------------------------------------------------------------------------------------------------------------------------------------------------------------------------------------------------------------------------|----------------------------------------------------------------------------------------------------------------|
|                                                                    | <ul style="list-style-type: none"> <li><input type="checkbox"/> N in group 2 [text]</li> <li><input type="checkbox"/> P-value (exact only) [text]</li> <li><input type="checkbox"/> T value [text]</li> <li><input type="checkbox"/> For matched studies, specify pre/post correlation [text]</li> <li><input type="checkbox"/> Outcome units [text]</li> <li><input type="checkbox"/> Outcome scales (i.e. lowest/highest possible values and if higher values are a more desired outcome)</li> <li><input type="checkbox"/> Detection limit or analytical sensitivity of test [text]</li> <li><input type="checkbox"/> If greater than two groups, specify data for other groups [text]</li> </ul> | <p>value /t-value</p> <p>(e.g. higher behaviour/knowledge scores) or less desired (higher Borrelia counts)</p> |
| <p><b>Difference in means (between exposed/control groups)</b></p> | <ul style="list-style-type: none"> <li><input type="checkbox"/> Define the two groups being compared [text]</li> <li><input type="checkbox"/> Difference in means (value) [text]</li> <li><input type="checkbox"/> N (total sample size) [text]</li> <li><input type="checkbox"/> Common SD [text]</li> <li><input type="checkbox"/> SE [text]</li> <li><input type="checkbox"/> Variance [text]</li> <li><input type="checkbox"/> 95% CI [text]</li> <li><input type="checkbox"/> P value (exact only) [text]</li> <li><input type="checkbox"/> T value [text]</li> </ul>                                                                                                                           |                                                                                                                |

|                      |                                                                                                                                                                                                                                                                                                                                                                                                                                              |                           |
|----------------------|----------------------------------------------------------------------------------------------------------------------------------------------------------------------------------------------------------------------------------------------------------------------------------------------------------------------------------------------------------------------------------------------------------------------------------------------|---------------------------|
|                      | <input type="checkbox"/> Outcome units [text]<br><input type="checkbox"/> Define the interpretation of the summary measure [text]<br><input type="checkbox"/> Outcome scales (i.e. lowest/highest possible values and if higher values are a more desired outcome)<br><input type="checkbox"/> Detection limit or analytical sensitivity [text]<br><input type="checkbox"/> Was outcome adjusted for other variables? Please specify: [text] |                           |
| Other outcomes       | <input type="checkbox"/> [text]                                                                                                                                                                                                                                                                                                                                                                                                              | e.g. Pearson correlations |
| Additional comments: | <input type="checkbox"/> [text]                                                                                                                                                                                                                                                                                                                                                                                                              |                           |

## References

- Balshem, H., M. Helfand, H. J. Schunemann, A. D. Oxman, R. Kunz, J. Brozek, G. E. Vist, Y. Falck-Ytter, J. Meerpohl, S. Norris and G. H. Guyatt, 2011: GRADE guidelines: 3. Rating the quality of evidence. *J Clin Epidemiol*, **64**, 401-406.
- Borenstein, M., L. V. Hedges, J. P. T. Higgins and H. R. Rothstein, 2009: *Introduction to Meta-Analysis*. John Wiley & Sons, Chichester ; Hoboken.
- Gardner, T., 1995: Lyme Disease. In: J. K. Remington, J. (ed.), *Infectious Diseases of the fetus and newborn infant*. W. B. Saunders company.
- Gardner, T., 2001: Chapter 11, Lyme Disease. In: J. K. Remington, J. (ed.), *Infectious Diseases of the Fetus and Newborn, 5th ed*. Saunders.
- Guyatt, G., A. D. Oxman, E. A. Akl, R. Kunz, G. Vist, J. Brozek, S. Norris, Y. Falck-Ytter, P. Glasziou, H. Debeer, R. Jaeschke, D. Rind, J. Meerpohl, P. Dahm and H. J. Schunemann, 2011a: GRADE guidelines: 1. Introduction-GRADE evidence profiles and summary of findings tables. *J Clin Epidemiol*, **64**, 383-394.
- Guyatt, G. H., A. D. Oxman, S. Sultan, P. Glasziou, E. A. Akl, P. Alonso-Coello, D. Atkins, R. Kunz, J. Brozek, V. Montori, R. Jaeschke, D. Rind, P. Dahm, J. Meerpohl, G. Vist, E. Berliner, S. Norris, Y. Falck-Ytter, M. H. Murad and H. J. Schunemann, 2011b: GRADE guidelines: 9. Rating up the quality of evidence. *Journal of clinical epidemiology*, **64**, 1311-1316.
- Higgins, J. and S. Green, 2011: *Cochrane Handbook for Systematic Reviews of Interventions*. Cochrane collaboration.

- Higgins, J. P. T. and D. G. Altman, 2008: Chapter 8: Assessing risk of bias in included studies. In: G. S. e. In: Higgins Jpt (ed.), *Cochrane Handbook for Systematic Reviews of Interventions Version 5.0.1 (updated September 2008)*. The Cochrane Collaboration.
- McClure, E. M. and R. L. Goldenberg, 2009: Infection and stillbirth. *Semin Fetal Neonatal Med*, **14**, 182-189.
- Mylonas, I., 2011: Borreliosis during pregnancy: a risk for the unborn child? *Vector borne zoonotic dis*, **11**, 891-898.
- Schunemann, H., S. Hill, G. Guyatt, E. A. Akl and F. Ahmed, 2011: The GRADE approach and Bradford Hill's criteria for causation. *J Epidemiol Community Health*, **65**, 392-395.
- Shapiro, E. D. G., M.A., 2011: Chapter 17: Borrelia Infections: Lyme Disease and Relapsing Fever. In: W. Britt (ed.), *Infectious Diseases of the Fetus and Newborn, 7th ed*. Elsevier.
- The, G. W. G., 2013: GRADE guidelines - best practices using the GRADE framework.
- Walsh, C. A., E. W. Mayer and L. V. Baxi, 2007: Lyme disease in pregnancy: case report and review of the literature. *Obstet Gynecol Surv*, **62**, 41-50.
